# Supplementary material
Source: Springer Nature journal article supplement (https://www.springermedizin.de/resource/supplementary/13063_2008_284_MOESM3_ESM.pdf/9622460)

ng/10ml

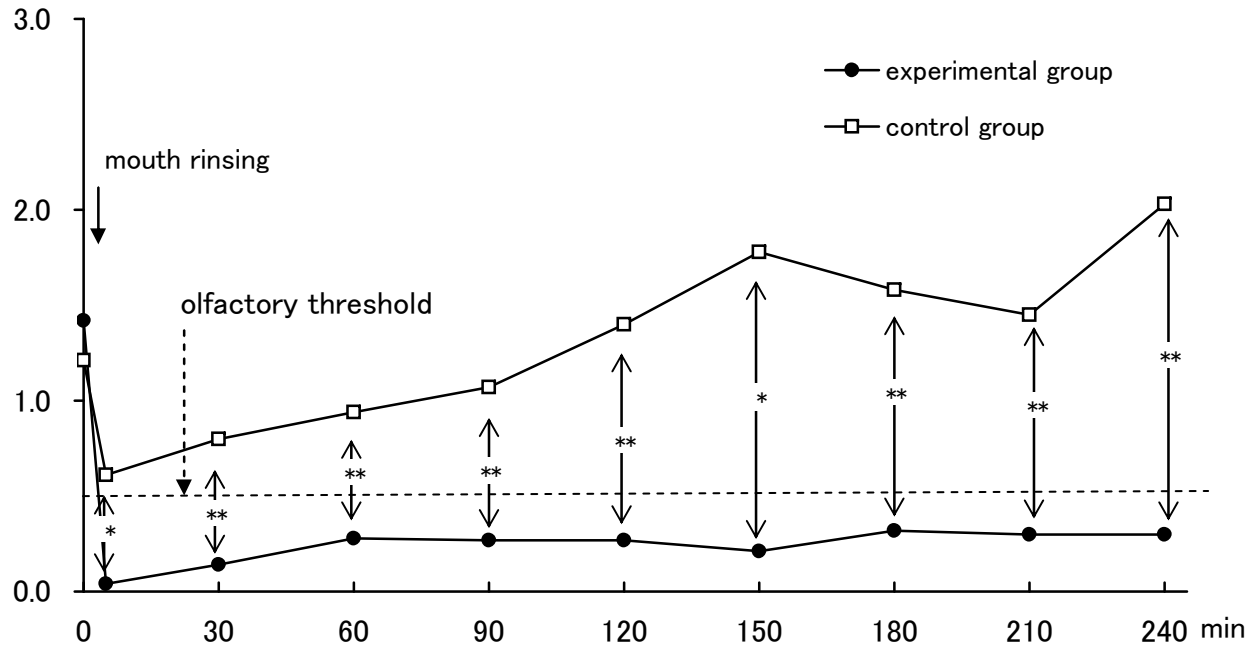

Supplement: MOESM3 [file 9622460]
